# Haptoglobin buffers lipopolysaccharides to safeguard against aberrant NF $\kappa$ B activation

Laura Zein<sup>1,2,3\*</sup>      Josina Grossmann<sup>1,2,4\*</sup>      Helena Swoboda<sup>1,2</sup>  
Christina Borgel<sup>1,2</sup>      Bernhard Wilke<sup>1,2</sup>      Stephan Awe<sup>5</sup>      Andrea Nist<sup>6</sup>  
Thorsten Stiewe<sup>6</sup>      Oliver Stehling<sup>7,8</sup>      Sven-Andreas Freibert<sup>7,8</sup>  
Till Adhikary<sup>1,2†</sup>      Ho-Ryun Chung<sup>2†</sup>

November 22, 2022

## Affiliations:

1. Institute for Molecular Biology and Tumor Research, Center for Tumor Biology and Immunology, Philipps University Marburg, Germany
2. Institute for Medical Bioinformatics and Biostatistics, Philipps University Marburg
3. Current address: Institute for Experimental Cancer Research in Pediatrics, Goethe University Frankfurt, Germany
4. Current address: Mammalian Cell Cycle Control Mechanisms Group, German Cancer Research Center, Heidelberg, Germany
5. Institute for Molecular Biology and Tumor Research, Biomedical Research Center, Philipps University Marburg
6. Genomics Core Facility, Center for Tumor Biology and Immunology, Philipps University Marburg
7. Protein Biochemistry and Spectroscopy Core Facility, Center for Synthetic Microbiology, Philipps University Marburg
8. Institute of Cytobiology, Center for Synthetic Microbiology, Philipps University Marburg

\* L. Zein and J. Grossmann contributed equally.

† Corresponding authors; [adhikary@imt.uni-marburg.de](mailto:adhikary@imt.uni-marburg.de), [ho.chung@staff.uni-marburg.de](mailto:ho.chung@staff.uni-marburg.de)

## 21 **Abstract** 21

22 Haptoglobin, an abundant serum protein, is the major detoxifier of hemoglobin. In addition, haptoglobin mod- 22  
23 ulates the inflammatory response *via* NF $\kappa$ B. However, in some studies haptoglobin represses and in others 23  
24 it activates NF $\kappa$ B signaling. Here, we show that these conflicting results are explainable by the ability of 24  
25 haptoglobin to bind and buffer lipopolysaccharides. While haptoglobin preparations from human serum in- 25  
26 duced NF $\kappa$ B-dependent transcription, we found that haptoglobin itself was dispensable. The effect was rather 26  
27 caused by lipopolysaccharides associated with haptoglobin. These were apparently enriched during purifica- 27  
28 tion. We show that haptoglobin binds lipopolysaccharides from different bacterial species with low micromolar 28  
29 affinities. This will result in competition with toll-like receptor 4, the lipopolysaccharide receptor, which we 29  
30 demonstrate to be sufficient for induction of NF $\kappa$ B-dependent transcription by haptoglobin. Given its abun- 30  
31 dance in human serum, haptoglobin constitutes a buffer for serum-borne lipopolysaccharides, shielding them 31  
32 from toll-like receptor 4 to safeguard against aberrant inflammatory reactions caused by small lipopolysac- 32  
33 charide fluctuations. Concordantly, NF $\kappa$ B activation in primary macrophages by purified haptoglobin was 33  
34 delayed relative to stimulation with pure lipopolysaccharide. Our findings warrant evaluation of therapeutic 34  
35 benefits of haptoglobin for non-hemolytic conditions as well as re-evaluation of purification strategies. Finally, 35  
36 they allow to disentangle the mechanistic basis of immunosuppression by oncofetal haptoglobin. 36

## 37 **Introduction** 37

38 Haptoglobin (HP) is an acute phase protein [1] that detoxifies free hemoglobin (HB) [2]. On one hand, HP 38  
39 represses lipopolysaccharide (LPS)-induced TLR4 (toll-like receptor 4)-NF $\kappa$ B signalling [3, 4]; on the other 39  
40 hand, it was reported to activate TLR4-NF $\kappa$ B signalling ([5, 6] and this study). Here, we show that the 40  
41 conflicting functions of HP in TLR4-NF $\kappa$ B signalling are explainable by HP's ability to bind and buffer LPSs. 41

## 42 **Methods** 42

### 43 **Cells and reagents** 43

44 Buffy coats from healthy female donors were from the University Clinic Marburg. MDMs (monocyte-derived 44  
45 macrophages) were differentiated as described [7]. Mixed-type HP was from Sigma and USBio. Ultrapure 45  
46 LPSs were from Invivogen. Proteinase K was from Biotin. Amicon filters were from Merck-Millipore. hTLR4 46  
47 (Addgene 13086), pcDNA3-CD14 (13645), and pFlag-CMV1-hMD2 (13028) were gifts from Ruslan Medzhi- 47

48 tov and Doug Golenbock. pGL4.32[luc2P/NF $\kappa$ B-RE/Hygro] was from Promega. Antibodies were from Novus 48  
49 ( $\alpha$ -HP JM10-79), Santa Cruz ( $\alpha$ -I $\kappa$ B $\alpha$  sc-371), and Sigma ( $\alpha$ - $\beta$ -actin AC-15). Hemoglobin ELISA was from 49  
50 Bethyl (E88-134). 50

## 51 **Expression analyses** 51

52 RT-qPCR and immunoblots were performed as described [7]. Primer sequences: 52

53 *IL1B*: TGAAAGCTCTCCACCTCCAGGGACA GAGGCCCAAGGCCACAGGTATTTTG 53

54 *IL8*: AGCTCTGTGTGAAGGTGCAGT GATAAATTTGGGGTGGAAAGGT 54

55 *RPL27*: AAAGCTGTCATCGTGAAGAAC GCTGTCACTTTGCGGGGGTAG 55

56 RNA was isolated using TRIfast (Peqlab) [7] with pre-isolation *D.melanogaster* S2 spike-in (1:10) and post- 56  
57 isolation ERCC spike-ins (Thermo Fisher). Libraries were prepared with QuantSeq FWD (Lexogen). Se- 57  
58 quencing was performed on a NextSeq 550 (Illumina). Data are deposited at GEO (GSE215916). 58

## 59 **Size exclusion chromatography and affinity measurements** 59

60 1 mg HP was run on a Superdex 200 Increase 10/300 (Cytiva) with 500 mM NaCl in PBS to remove LPSs. 60  
61 Microscale thermophoresis was performed as published [8] with freshly RED-NHS-labeled protein. 61

## 62 **Results and discussion** 62

63 HP purified from human serum induced the expression of *IL1B* (>1,000-fold; fig. 1A) in MDMs. By contrast, 63  
64 HB alone did not induce *IL1B* expression (fig. 1A), which together with the fact that the HP preparation 64  
65 contained only spurious amounts of HB (fig. 1B) indicates that HB is dispensable for *IL1B* induction by HP. 65  
66 Transcriptome analysis of HP-treated *versus* control MDMs identified differentially expressed genes that are 66  
67 typical for an NF $\kappa$ B-dependent response (fig. 1C). 67

68 The NF $\kappa$ B-type transcriptomic response led to the idea that HP activates NF $\kappa$ B *via* TLR4. To test this, we 68  
69 performed a synthetic complementation assay in HEK293 cells, where only the forced expression of TLR4, 69  
70 CD14, and MD2 led to induction of *IL8* by purified HP (fig. 1D) indicating that TLR4, CD14, and MD2 together 70  
71 are sufficient to confer sensitivity to HP. In line with this idea, an NF $\kappa$ B-responsive reporter was induced by HP 71  
72 only when we complemented TLR4, CD14, and MD2 in HEK293 cells (fig. 1E), demonstrating that purified 72  
73 HP activates NF $\kappa$ B-dependent transcription *via* TLR4. 73

74 Since HP binds to TLR4 [6], we reasoned that HP directly activates NF $\kappa$ B-dependent transcription *via* 74

75 TLR4. To test this hypothesis, we enzymatically digested HP using proteinase K. Unexpectedly, we found 75  
76 that proteolysis did not abolish NF $\kappa$ B-dependent transcription (fig. 2A). Thus, HP protein is dispensable for 76  
77 the activation of NF $\kappa$ B-dependent transcription *via* TLR4. 77

78 The stimulus remained in the supernatant after ultrafiltration with a 10 kDa cutoff (fig. 2A). The canonical 78  
79 agonists of TLR4 are LPSs; we therefore speculated that HP is associated with LPSs. To test this, we 79  
80 checked whether the antagonistic LPS-Rs (from *R.sphaeroides*) competes with the non-protein factor in the 80  
81 HP preparation. LPS-Rs led to reduced *IL8* induction in response to HP (fig. 2B), indicating the presence of 81  
82 TLR4 agonists. Next, we used a sensitive silver stain to detect LPSs in digested HP [9]. The assay revealed 82  
83 distinct high molecular weight bands, which are observed in preparations from different bacteria (especially 83  
84 in clinical isolates [10]) and indicate the presence of long-chain “smooth” LPSs (fig. 2C). Slower migration of 84  
85 discernible leading bands suggests that the lipid A and inner core moieties of the LPSs differ from the *E.coli* 85  
86 reference, which exhibits a ladder of regularly increasing chain lengths. Thus, the detected LPSs largely 86  
87 originate from various bacterial species other than *E.coli*. 87

88 *Limulus* amoebocyte lysate assay detected 2.5–5 ng LPS/ $\mu$ g protein in different HP preparations (not 88  
89 shown)—at 1 mg/ml HP in serum, this translates into >2.5  $\mu$ g/ml LPS, which is more than two orders of 89  
90 magnitude above reported levels (LPS is present at 1–50 pg/ml in human serum due to intestinal permeabil- 90  
91 ity [11]). Since the LPSs are heterogeneous and different from *E.coli* LPS (fig. 2C), contamination of the HP 91  
92 preparations seems unlikely. A more parsimonious explanation for large amount of LPSs in the preparations 92  
93 is given by the fact that LPS-containing complexes are selectively precipitated by ethanol [12]. It is conceiv- 93  
94 able that the widely used Cohn cold ethanol serum fractionation protocol leads to enrichment of LPS-bound 94  
95 HP. 95

96 To further substantiate the claim that co-purified LPSs rather than the HP protein activate NF $\kappa$ B-dependent 96  
97 transcription *via* TLR4, we treated THP-1 cells with HP protein separated from LPS by gel filtration, resulting 97  
98 in poor induction of NF $\kappa$ B target genes (not shown). Microscale thermophoresis indicates  $K_d$  values <10  $\mu$ M 98  
99 for repurified HP and LPSs from three bacterial species (fig. 2D) that represent different lipid A structures. The 99  
100 *S.minnesota* strain R595 produces rough LPS (lacking repeating oligosaccharide units) exclusively; binding 100  
101 of this molecule establishes that HP interacts with the lipid A or inner core moiety (or both). 101

102 These results show that commercially available HP contains LPSs such that the addition of these HP 102  
103 preparations to cells leads to the release of LPSs, which in turn activate TLR4. However, activation should 103  
104 be delayed due to limited LPS availability: HP competes with TLR4 for LPS. In line with this notion, we found 104  
105 that I $\kappa$ B $\alpha$  degradation induced by HP was delayed relative to high-dose and low-dose *E.coli* LPS (fig. 2E). 105  
106 I $\kappa$ B $\alpha$  degradation kinetics depend on LPS concentration [13, 14]. Although the deployed HP should contain 106

107 an amount of LPSs corresponding to the high-dose *E.coli* LPS condition, I $\kappa$ B $\alpha$  degradation was much slower, 107  
108 indicating that only a comparably low amount of LPSs was released. 108

109 Taken together, we show that HP binds LPSs with low micromolar affinities. Our data provide a mechanistic 109  
110 explanation for conflicting observations on the role of HP in NF $\kappa$ B signaling [3–6]. Moreover, they establish 110  
111 HP to function as a buffer for LPSs. This buffering function is relevant because the rate of change of stimulus 111  
112 concentration controls the NF $\kappa$ B response [14–16]. HP dampens variations in LPS concentration by shielding 112  
113 LPS from TLR4, such that larger concentration changes are required to trigger an equivalent response. In 113  
114 agreement with this model, HP reduces LPS-dependent cytokine expression in a dose-dependent manner 114  
115 [3]. 115

116 HP is used therapeutically for hemolytic conditions [17]. Our findings extend applications to inflammatory 116  
117 states induced by elevated LPS levels in sepsis and chronic conditions such as neurodegeneration [11], psy- 117  
118 chiatric diseases, inflammatory bowel disease, and metabolic syndrome [18]. Here, increasing LPS buffering 118  
119 capacity by HP may improve clinical outcomes. Importantly, HP isolation procedures should avoid LPS en- 119  
120 richment. 120

121 Two main *HP* alleles exist in humans. Allele 2 encodes for a second multimerisation domain, resulting in 121  
122 oligomer formation [1]. HP isoforms may differentially bind LPS (we however observed no overt differences in 122  
123 NF $\kappa$ B activation). The HP precursor expressed from allele 2, zonulin, increases intestinal permeability [19]. 123  
124 Our findings raise the possibility that zonulin binds LPS. 124

125 “Oncofetal” HP, which is observed during neoplasia and pregnancy [1], is a much stronger immunosuppres- 125  
126 sant than normal adult HP [20]; the mechanistic basis of enhanced immunosuppression remains unclear. Our 126  
127 findings suggest that the alternative glycosylation of oncofetal HP [21] potentially alters its affinity towards 127  
128 LPSs. Alternatively, oncofetal HP may regulate inflammation through LPS-independent mechanisms, which 128  
129 if true warrants separation of beneficial from malignant functions of HP. 129

## 130 **Acknowledgements** 130

131 We gratefully acknowledge the contribution of the Protein Biochemistry and Spectroscopy Core Facility (In- 131  
132 stitute of Cytobiology, Center for Synthetic Microbiology, Philipps University Marburg) for help with MST anal- 132  
133 yses. We are grateful to Sovana Adhikary, Matthias Lauth, and Alexander Visekruna for critical reading of 133  
134 the manuscript. We thank Jonathan Lenz and Igor Mačinković for Schneider S2 cells. Funding was provided 134  
135 by Philipps University Marburg, Department of Medicine (to H.-R.C.). 135

136 **Author contributions** 136

137 L.Z., J.G., H.S., C.B., B.W., and T.A. planned and performed experiments, contributed reagents, and ana- 137  
138 lyzed data. S.-A.F. and O.S. planned experiments. S.-A.F. optimised MST assays and analyzed data. S.A. 138  
139 performed gel filtration. A.N. and T.S. performed high-throughput sequencing. H.-R.C. planned experiments 139  
140 and analyzed data. T.A. drafted the manuscript. T.A. and H.-R.C. wrote the final manuscript. 140

141 **Disclosure of Conflicts of Interest** 141

142 None. 142

143 **References** 143

- 144 1. W. Dobryszczyka. Biological functions of haptoglobin. *Eur J Clin Chem Clin Biochem*, 35(9):647–54, 1997. 144
- 145 2. M. Kristiansen, J. H. Graversen, C. Jacobsen, O. Sonne, H.-J. Hoffman, S. K. A. Law, and S. K. Moestrup. 145  
146 Identification of the haemoglobin scavenger receptor. *Nature*, 409(6817):198–201, 2001. doi:10.1038/35051594. 146
- 147 3. M. S. Arredouani, A. Kasran, J. A. Vanoirbeek, F. G. Berger, H. Baumann, and J. L. Ceuppens. Haptoglobin 147  
148 dampens endotoxin-induced inflammatory effects both *in vitro* and *in vivo*. *Immunology*, 114(2):263–71, 2005. 148  
149 doi:10.1111/j.1365-2567.2004.02071.x. 149
- 150 4. J. D. Belcher, C. Chen, J. Nguyen, F. Abdulla, P. Zhang, H. Nguyen, P. Nguyen, T. Killeen, S. M. Miescher, 150  
151 N. Brinkman, K. A. Nath, C. J. Steer, and G. M. Vercellotti. Haptoglobin and hemopexin inhibit vaso-occlusion and 151  
152 inflammation in murine sickle cell disease: Role of heme oxygenase-1 induction. *PLoS One*, 13(224):e0196455, 152  
153 2018. doi:10.1371/journal.pone.0196455. 153
- 154 5. H. Shen, Y. Song, C. M. Colangelo, T. Wu, C. Bruce, G. Scabia, A. Galan, M. Maffei, and D. R. Goldstein. 154  
155 Haptoglobin activates innate immunity to enhance acute transplant rejection in mice. *J Clin Invest*, 122(1), 2011. 155  
156 doi:10.1172/JCI58344. 156
- 157 6. J.-O. Kwon, W. J. Jin, B. Kim, H. Ha, H.-H. Kim, and Z. H. Lee. Haptoglobin Acts as a TLR4 Ligand to Suppress 157  
158 Osteoclastogenesis via the TLR4–IFN- $\beta$  Axis. *J Immunol*, 202(12):3359–69, 2019. doi:10.4049/jimmunol.1800661. 158
- 159 7. A. Unger, F. Finkernagel, N. Hoffmann, F. Neuhaus, B. Joos, A. Nist, T. Stiewe, A. Visekruna, U. Wagner, 159  
160 S. Reinartz, S. Müller-Brüsselbach, R. Müller, and T. Adhikary. Chromatin binding of c-REL and p65 is not limiting 160  
161 for macrophage *IL12B* transcription during immediate suppression by ovarian carcinoma ascites. *Front Immunol*, 161  
162 9:1425, 2018. doi:10.3389/fimmu.2018.01425. 162

- 163 8. S.-A. Freibert, M. T. Boniecki, C. Stümpfig, V. Schulz, N. Krapoth, D. R. Winge, U. Mühlhoff, O. Stehling, 163  
164 M. Cygler, and R. Lill. N-terminal tyrosine of ISCU2 triggers [2Fe-2S] cluster synthesis by ISCU2 dimerization. 164  
165 *Nat Commun*, 12(1), 2021. doi:10.1038/s41467-021-27122-w. 165
- 166 9. C.-M. Tsai and C. E. Frasch. A Sensitive Silver Stain for Detecting Lipopolysaccharides in Polyacrylamide Gels. 166  
167 *Anal Biochem*, 119(1):115–9, 1981. doi:10.1016/0003-2697(82)90673-x. 167
- 168 10. A. P. Morgan, I. M. Helander, and T. U. Kosunen. Compositional analysis of *Helicobacter pylori* Rough-Form 168  
169 Lipopolysaccharides. *J Bacteriol*, 174(4):1370–7, 1992. doi:10.1128/jb.174.4.1370-1377.1992. 169
- 170 11. G. C. Brown. The endotoxin hypothesis of neurodegeneration. *JNI*, 16(1):180, 2019. doi:10.1186/s12974-019- 170  
171 1564-7. 171
- 172 12. S. C. Bailey and D. Apirion. Identification of Lipopolysaccharides and Phospholipids of *Escherichia coli* in 172  
173 Polyacrylamide Gels. *J Bacteriol*, 131(1):347–55, 1977. 173
- 174 13. A. V. Bagaev, A. Y. Garaeva, E. S. Lebedeva, A. V. Pichugin, R. I. Ataulakhanov, and F. I. Ataulakhanov. 174  
175 Elevated pre-activation basal level of nuclear NF- $\kappa$ B in native macrophages accelerates LPS-induced translocation 175  
176 of cytosolic NF- $\kappa$ B into the cell nucleus. *Sci Rep*, 9(1):4563, 2019. doi:10.1038/s41598-018-36052-5. 176
- 177 14. Q. J. Cheng, S. Ohta, K. M. Sheu, R. Spreafico, A. Adelaja, B. Taylor, and A. Hoffmann. NF- $\kappa$ B dynamics 177  
178 determine the stimulus specificity of epigenomic reprogramming in macrophages. *Science*, 372(6548):1349–53, 178  
179 2021. doi:10.1126/science.abc0269. 179
- 180 15. M. Son, A. G. Wang, H.-L. Tu, M. Oliver Metzger, P. Patel, K. Husain, J. Lin, A. Murugan, A. Hoffmann, and S. Tay. 180  
181 NF- $\kappa$ B responds to absolute differences in cytokine concentrations. *Science Signaling*, 14(666):eaaz4382, 2021. 181  
182 doi:10.1126/scisignal.aaz4382. 182
- 183 16. A. Adelaja, B. Taylor, K. M. Sheu, Y. Liu, S. Luecke, and A. Hoffmann. Six distinct NF $\kappa$ B signaling codons convey 183  
184 discrete information to distinguish stimuli and enable appropriate macrophage responses. *Immunity*, 54(5):916–30, 184  
185 2021. doi:10.1016/j.immuni.2021.04.011. 185
- 186 17. D. J. Schaer, P. W. Buehler, A. I. Alayash, J. D. Belcher, and G. M. Vercellotti. Hemolysis and free hemoglobin 186  
187 revisited: exploring hemoglobin and hemin scavengers as a novel class of therapeutic proteins . *Blood*, 121(8), 187  
188 2013. doi:10.1182/blood-2012-11-451229. 188
- 189 18. K. de Punder and L. Pruimboom. Stress induces endotoxemia and low-grade inflammation by increasing barrier 189  
190 permeability. *Front Immunol*, 6:223, 2015. doi:10.3389/fimmu.2015.00223. 190
- 191 19. A. Tripathi, K. M. Lammers, S. Goldblum, T. Shea-Donahue, S. Netzel-Arnett, M. S. Buzza, T. M. Antalis, S. N. 191  
192 Vogel, A. Zhao, S. Yang, M.-C. Arrietta, J. B. Meddings, and A. Fasano. Identification of human zonulin, 192  
193 a physiological modulator of tight junctions, as prehaptoglobin-2. *Proc Natl Acad Sci*, 106(39):39, 2009. 193  
194 doi:10.1073/pnas.0906773106. 194

- 195 20. S.-K. Oh, D. L. Very, J. Walker, S Raam, and S. T. Ju. An analogy between fetal haptoglobin and a potent  
196 immunosuppressant in cancer. *Cancer Res*, 47:5120–6, 1987.
- 197 21. N. Okuyama, Y. Ide, M. Nakano, T. Nakagawa, K. Yamanaka, K. Morikawi, K. Murata, H. Ohgashi, S. Yokoyama,  
198 H. Eguchi, O. Ishikawa, T. Ito, M. Kato, A. Kasahara, S. Kawano, J. Gu, N. Taniguchi, and E. Miyoshi. Fucosylated  
199 haptoglobin is a novel marker for pancreatic cancer: A detailed analysis of the oligosaccharide structure and a  
200 possible mechanism for fucosylation. *Int J Cancer*, 118(11):2803–8, 2006. doi:10.1002/ijc.21728.

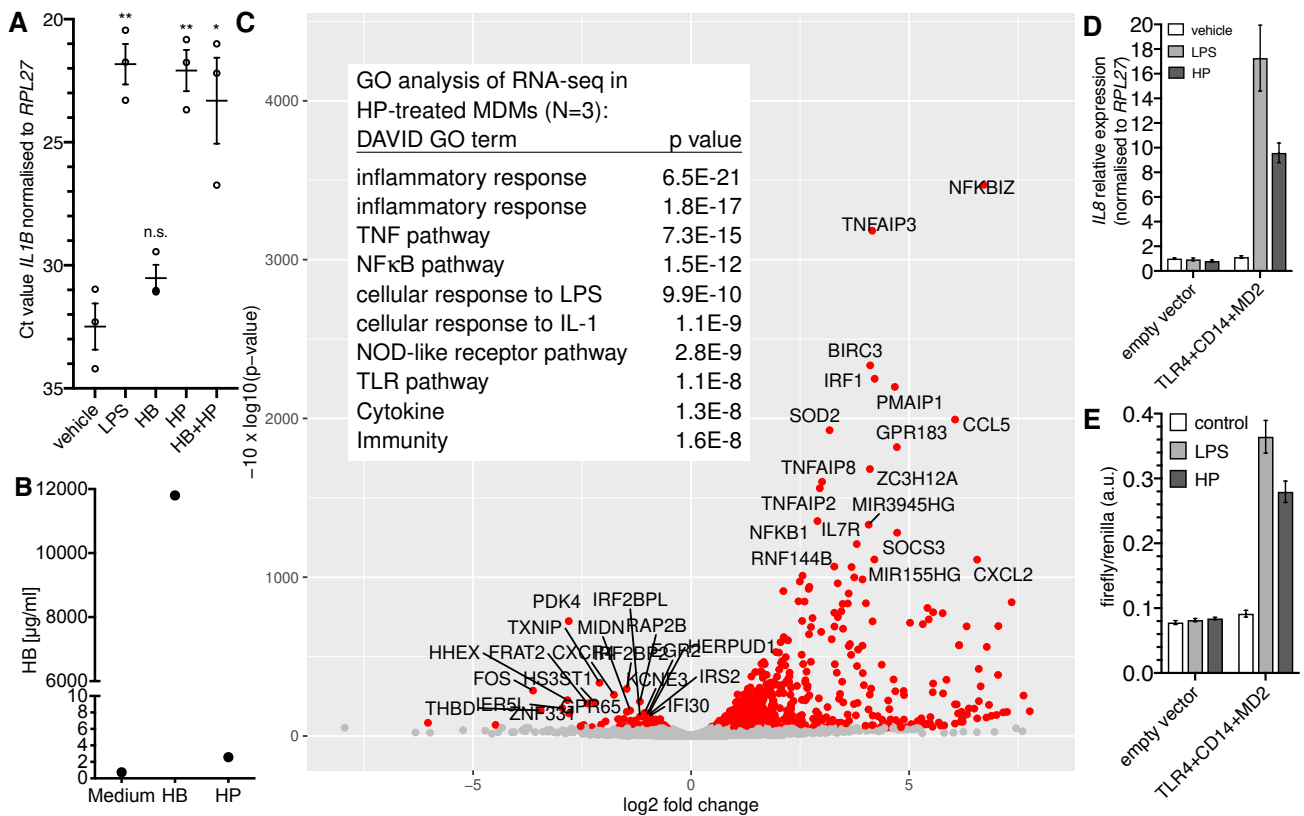

Figure 1: Purified haptoglobin induces NFκB-dependent transcription through TLR4 in the absence of hemoglobin. (A) MDMs from blood donors (N=3) were treated with 100 ng/ml *E.coli* LPS or HB (25 μg/ml), HP (25 μg/ml), or both for six hours. Expression of *IL1B* was measured by RT-qPCR. Error bars represent standard deviations. Bonferroni-corrected significance (unpaired t test): \*\*, p < 0.01; \*, p < 0.05; n.s., not significant. (B) ELISA analyses of the hemoglobin content of HB and HP. Nominal protein concentration is 10 mg/ml each. (C) Volcano plot of RNA-seq data; HP treatment of MDMs from three donors (HP; 25 μg/ml for 4 h vs. solvent control). Table inset: Top ten GO terms assigned by the DAVID database to the top 50 upregulated genes. (D) HEK293 cells were transfected as indicated and treated with either solvent, *E.coli* LPS (100 ng/ml), or HP (25 μg/ml) for 6 h. *IL8* expression was monitored by RT-qPCR. This is representative of three independent experiments. (E) HEK293 cells were transfected as in A plus an NFκB firefly luciferase reporter plasmid (5×NFκB-luc) and a constitutive *Renilla*-luc reporter and treated as in A. Representative of two independent experiments. D, E: Error bars represent standard deviations from three technical replicates.



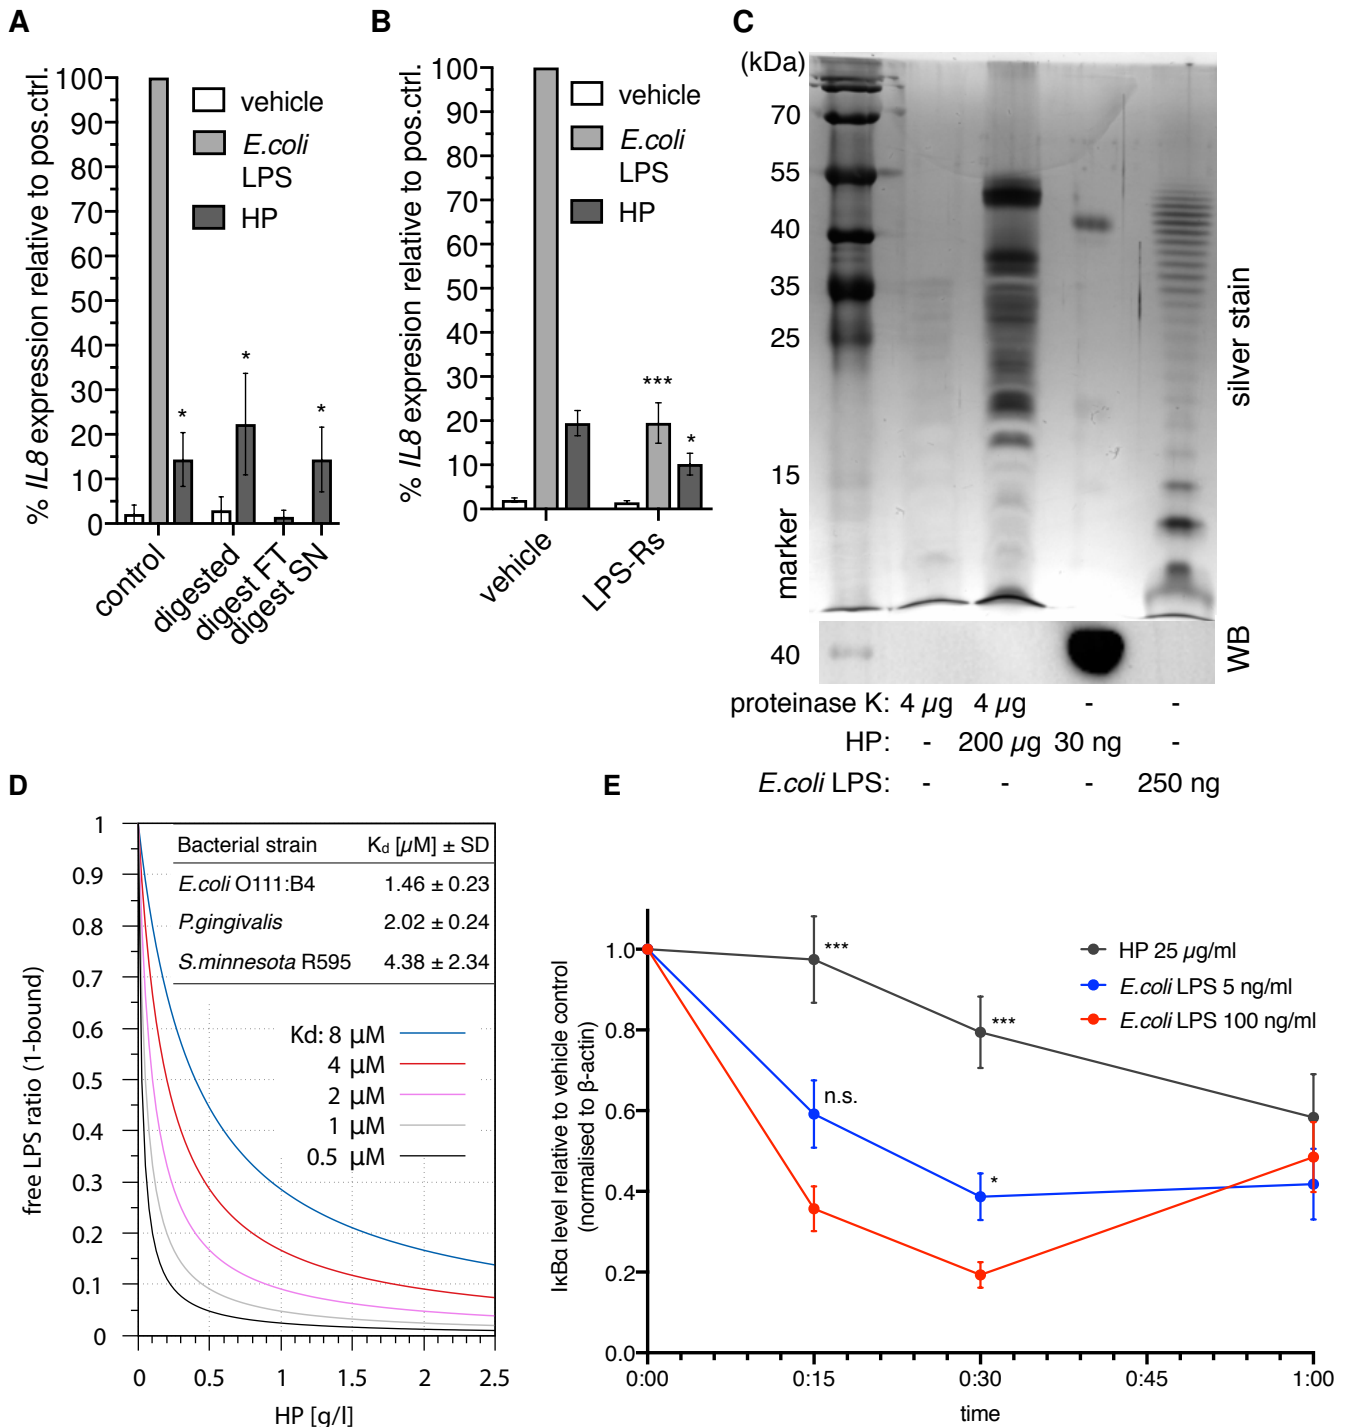

Figure 2: Haptoglobin is associated with lipopolysaccharides and induces delayed NF $\kappa$ B activation. **(A)** HP was treated with proteinase K. An aliquot was ultrafiltrated with a 10 kDa cutoff; FT, flowthrough; SN, supernatant. THP-1 cells were treated for 6 h with these preparations as indicated or with 100 ng/ml *E.coli* O111:B4 LPS, and RT-qPCR of the *IL8* transcript was performed. \*,  $p < 0.05$  relative to the corresponding negative control (unpaired T test). Error bars represent SD. One of two independent experiments is shown. **(B)** Cells were treated as in A with or without LPS-Rs (10  $\mu$ g/ml). Error bars represent SEM (N=6). \*\*\*,  $p < 0.001$ ; \*,  $p < 0.05$  relative to the corresponding sample without LPS-Rs (unpaired T test). **(C)** Upper panel: Silver stain of the indicated samples after deoxycholate-urea PAGE under reducing conditions. HP was digested with proteinase K for 2 h at 55  $^{\circ}$ C or not as indicated. Digestion of the protein was complete as indicated by immunoblotting against the HP  $\beta$  chain (lower panel). **(D)** Calculated ratios of free vs. HP-bound LPS at the indicated  $K_d$  values. Physiological HP concentrations range from 0.3–2 g/l. At 1 g/l, HP concentration per  $\alpha\beta$ -subunit is 20  $\mu$ M. Table inset: Microscale thermophoresis data obtained with HP repurified using gel filtration and ultrapure LPS preparations from the indicated bacterial strains. Microscale thermophoresis measurements were performed with three HP preparations each. **(E)** I $\kappa$ B $\alpha$  degradation induced by HP shows delayed kinetics relative to pure LPS. MDMs were treated with *E.coli* LPS (100 ng/ml, 5 ng/ml) or HP (25  $\mu$ g/ml). I $\kappa$ B $\alpha$  levels were monitored by immunoblotting. Chemoluminescence was quantitated with a CCD-based imaging system. I $\kappa$ B $\alpha$  levels were normalised to  $\beta$ -actin. Dots indicate the calculated means (N=7). Error bars denote SEM. Significance relative to high-dose LPS (unpaired T test): \*\*\*,  $p < 0.001$ ; \*,  $p < 0.05$ ; n.s., not significant. Significance was Bonferroni-corrected for multiple hypothesis testing.
